# Supplementary material
Source: publisher figshare collection journal article supplement (https://tandf.figshare.com/ndownloader/files/12805397)
Supplement: Supplementary file 1 [file 12805397]

**Supplemental Materials**

| **Supplemental Table S1: Admission diagnoses** | | | |
| --- | --- | --- | --- |
|  | Ketamine | Haloperidol/Benzodiazepine | Physical Restraint |
| Admitting Diagnosis | Agitated Delirium requiring intubation (6) | Agitated Delirium requiring intubation (1) | Sepsis requiring intubation (1) |
|  | Agitated Delirium not requiring intubation (4) | Agitated Delirium not requiring intubation (2) | Agitated Delirium not requiring intubation (4) |
|  | Airway Loss requiring intubation (2) | Seizure (1) | Hemorrhagic stroke requiring intubation (1) |
|  | Poly-substance overdose requiring intubation (1) | Trauma not requiring intubation (hanging) (1) | Poly-substance overdose requiring intubation (1) |
|  | Poly-substance overdose not requiring intubation (1) | Poly-substance overdose not requiring intubation (1) |  |
|  | Abscess (1) | Pneumonia/ETOH withdrawal (1) |  |
|  | Seizure (1) | Section 12/placement (1) |  |
|  | Rhabdomyolysis (2) | Rhabdomyolysis (2) |  |
|  | Pancreatitis/Renal failure (1) |  |  |
|  | Sternal Fracture (1) |  |  |
|  | Trauma requiring intubation (stabbing) (1) |  |  |
|  | Serotonin Syndrome (1) |  |  |
